# Supplementary material
Source: MDPI journal article supplement (https://www.mdpi.com/2071-1050/16/4/1703)
Supplement: s1 [file s1]

**Supplementary Information for**

**Remediation technologies of contaminated sites in China:  
Application and spatial clustering characteristics**

Jingjing Yu <sup>1,2</sup>, Panpan Wang <sup>2</sup>, Bei Yuan <sup>2</sup>, Minghao Wang <sup>3</sup>, Pengfei Shi <sup>1,2</sup> and Fasheng Li <sup>1,2,\*</sup>

*<sup>1</sup> College of Water Sciences, Beijing Normal University, Beijing 100875, China*

*<sup>2</sup> State Key Laboratory of Environmental Criteria and Risk Assessment, Chinese Research Academy of Environmental Sciences, Beijing 100012, China*

*<sup>3</sup> China Metallurgical Industry Planning and Research Institute, Beijing 100013, China*

**\*Corresponding author**

E-mail address: lifs@craes.org.cn (F. Li).

## Figures

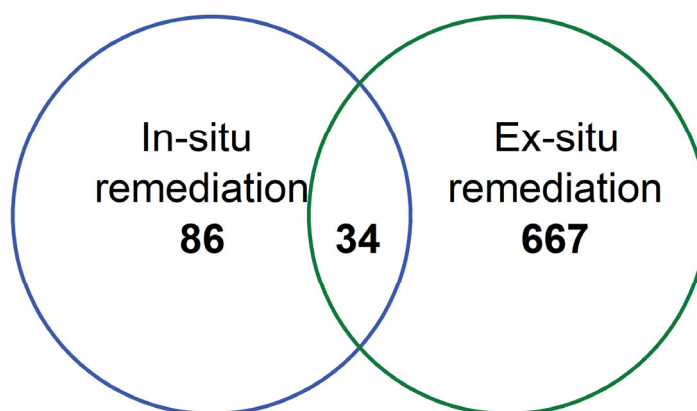

**Figure S1** Summary of in-situ and ex-situ remediation methods used in contaminated land.

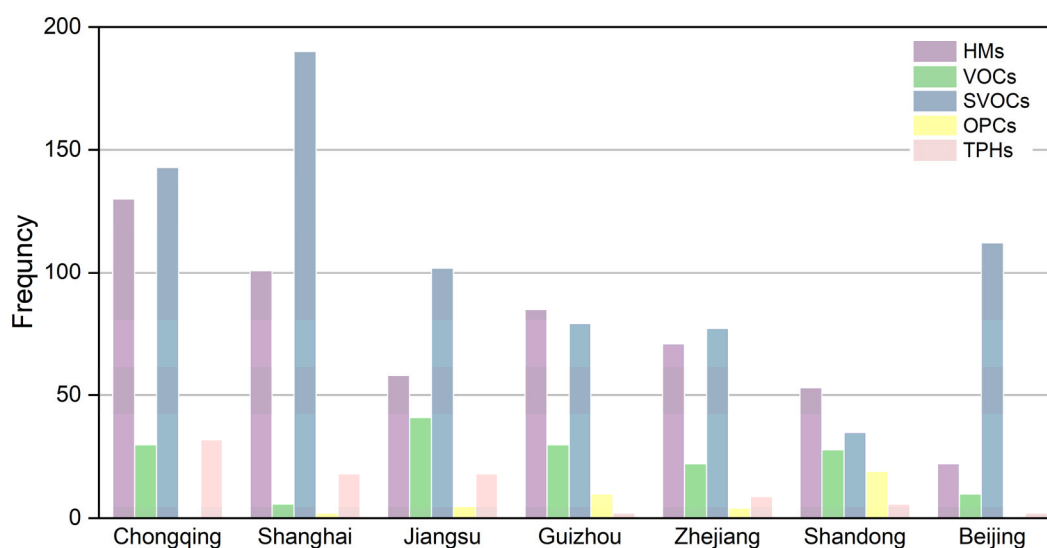

**Figure S2** The occurrence of target pollutants at contaminated sites within the major provinces (municipalities) of Chongqing, Shanghai, Jiangsu, Guizhou, Zhejiang, Shandong, and Beijing. The distribution of these five categories of pollutants (HMs, VOCs, SVOCs, OPCs, and TPHs) exhibits significant variations among the provinces (municipalities).

## Tables

**Table S1** Frequency and rates of application of the 10 remediation technologies

| Remediation technologies         | Abbreviation | Number | Percentage |
|----------------------------------|--------------|--------|------------|
| Cement Kiln Co-processing        | CKCP         | 893    | 43.88%     |
| Chemical Oxidization/Reduction   | CO/CR        | 463    | 22.75%     |
| Thermal Desorption               | TR           | 274    | 13.46%     |
| Solidification and Stabilization | S/S          | 269    | 13.22%     |
| Soil Washing                     | SW           | 78     | 3.83%      |
| mechanical soil aeration         | MSA          | 20     | 0.98%      |
| Bioremediation                   | BR           | 15     | 0.74%      |
| Excavation and Landfill          | EL           | 14     | 0.69%      |
| Incineration Remediation         | IR           | 6      | 0.29%      |
| Soil Vapor Extraction            | SVE          | 3      | 0.15%      |

**Table S2** Abbreviations and frequency of concerned pollutants in contaminated sites. The pollutants were classified into five categories: heavy metals (HMs), volatile organic compounds (VOCs), semi-volatile organic compounds (SVOCs), organic pesticide contaminants (OPCs), and total petroleum hydrocarbons (TPHs).

| Contaminant           | Abbreviation | Type | Number |
|-----------------------|--------------|------|--------|
| Vanadium              | V            | HMs  | 13     |
| Cobalt                | Co           | HMs  | 25     |
| Antimony              | Sb           | HMs  | 32     |
| Hexavalent chromium   | Cr(VI)       | HMs  | 51     |
| Cadmium               | Cd           | HMs  | 57     |
| Mercury               | Hg           | HMs  | 59     |
| Copper                | Cu           | HMs  | 78     |
| Lead                  | Pb           | HMs  | 93     |
| Nickel                | Ni           | HMs  | 115    |
| Arsenic               | As           | HMs  | 186    |
| Methylbenzene         | MB           | VOCs | 6      |
| 1,1,2-Trichloroethane | 1,1,2-TCA    | VOCs | 7      |
| M-xylene and P-xylene | MX-PX        | VOCs | 8      |
| Tetrachloromethane    | CTT          | VOCs | 8      |
| Chlorobenzene         | CB           | VOCs | 9      |
| Vinyl chloride        | VC           | VOCs | 13     |
| Ethylbenzene          | EB           | VOCs | 16     |
| Trichloroethylene     | TCE          | VOCs | 20     |

|                                       |               |       |     |
|---------------------------------------|---------------|-------|-----|
| 1,2-Dichloroethane                    | 1,2-DCA       | VOCs  | 21  |
| 1,2,3-Trichloropropane                | 1,2,3-TCP     | VOCs  | 24  |
| Chloroform                            | CF            | VOCs  | 28  |
| Benzene                               | BE            | VOCs  | 68  |
| Nitrobenzene                          | NB            | SVOCs | 7   |
| Aniline                               | AN            | SVOCs | 10  |
| Chrysene                              | CH            | SVOCs | 16  |
| Naphthalene                           | NPH           | SVOCs | 30  |
| Benzo[k]fluoranthene                  | BkF           | SVOCs | 42  |
| Indeno[1,2,3-cd]Pyrene                | IP            | SVOCs | 117 |
| Benzo[a]anthracene                    | BaA           | SVOCs | 144 |
| Benzo[b]fluorathene                   | BbF           | SVOCs | 154 |
| Dibenz[a,h]anthracene                 | DBA           | SVOCs | 170 |
| Benzo[a]pyrene                        | BaP           | SVOCs | 261 |
| DDT                                   | DDT           | OPCs  | 4   |
| p,p'-DDD                              | p,p'-DDD      | OPCs  | 5   |
| p,p'-DDE                              | p,p'-DDE      | OPCs  | 5   |
| $\gamma$ -BHC                         | $\gamma$ -BHC | OPCs  | 8   |
| $\alpha$ -BHC                         | $\alpha$ -BHC | OPCs  | 12  |
| $\beta$ -BHC                          | $\beta$ -BHC  | OPCs  | 12  |
| Hexachlorobenzene                     | HCB           | OPCs  | 20  |
| Total Petroleum hydrocarbon (C10-C40) | TPHs          | TPHs  | 110 |

**Table S3** Applications rate of remediation technologies in different provinces (municipalities).

| Province<br>(municipality) | CKCP   | CO/CR  | TR     | S/S    | SW     | MSA    | BR     | EL     | IR     | SVE    |
|----------------------------|--------|--------|--------|--------|--------|--------|--------|--------|--------|--------|
| Chongqing                  | 27.21% | 8.64%  | 8.36%  | 8.55%  | 3.85%  |        | 13.33% | 7.14%  |        |        |
| Shanghai                   |        | 41.68% | 6.18%  | 14.13% | 78.21% | 25.00% |        |        | 16.67% | 66.67% |
| Jiangsu                    | 13.33% | 6.48%  | 15.27% | 10.78% |        | 10.00% |        | 14.29% |        |        |
| Guizhou                    | 19.71% | 1.08%  | 5.82%  | 3.35%  |        |        |        |        |        |        |
| Zhejiang                   | 4.93%  | 8.86%  | 17.09% | 15.61% | 1.28%  | 5.00%  |        | 7.14%  | 83.33% | 33.33% |
| Shandong                   | 9.74%  | 7.13%  | 1.45%  | 5.95%  |        | 5.00%  |        |        |        |        |
| Beijing                    | 12.21% | 3.24%  | 5.45%  | 0.37%  |        |        | 40.00% |        |        |        |
| Liaoning                   | 2.35%  | 1.51%  | 16.73% | 5.95%  | 7.69%  | 5.00%  | 20.00% |        |        |        |
| Tianjin                    | 1.90%  | 3.67%  | 8.00%  | 0.74%  |        |        |        |        |        |        |
| Guangdong                  |        | 1.73%  | 4.00%  | 10.04% |        | 10.00% |        |        |        |        |
| Hebei                      | 1.23%  | 5.62%  |        |        |        | 25.00% |        | 14.29% |        |        |
| Hunan                      | 0.34%  | 1.51%  | 0.36%  | 11.15% |        | 0.00%  | 13.33% |        |        |        |
| Shanxi                     | 1.79%  | 1.51%  | 5.82%  |        |        | 15.00% |        |        |        |        |
| Hubei                      | 2.02%  | 2.59%  | 0.36%  | 3.35%  |        |        |        |        |        |        |
| Sichuan                    | 1.01%  | 2.16%  | 1.09%  | 2.97%  | 8.97%  |        |        |        |        |        |
| Anhui                      | 1.68%  | 0.00%  | 2.55%  |        |        |        |        | 14.29% |        |        |
| Guangxi                    |        | 0.43%  | 1.45%  | 2.97%  |        |        |        | 14.29% |        |        |
| Fujian                     | 0.56%  |        |        | 1.49%  |        |        |        |        |        |        |
| Jiangxi                    |        | 0.86%  |        | 1.49%  |        |        |        |        |        |        |
| Gansu                      |        | 1.30%  |        | 0.37%  |        |        |        |        |        |        |
| Yunan                      |        |        |        | 0.37%  |        |        |        | 28.57% |        |        |
| Jilin                      |        |        |        | 0.37%  |        |        | 13.33% |        |        |        |
